# Supplementary material for: Combination of SAXS and Protein Painting Discloses the Three-Dimensional Organization of the Bacterial Cysteine Synthase Complex, a Potential Target for Enhancers of Antibiotic Action
Source: MDPI journal article supplement (doi:10.3390/ijms20205219), 2019-10-21
Supplement: s1 [file s1]

## Supplementary Materials

# Combination of SAXS and Protein Painting Discloses the Three-Dimensional Organization of the Bacterial Cysteine Synthase Complex, a Potential Target for Enhancers of Antibiotic Action

Brenda Rosa <sup>1</sup>, Marialaura Marchetti <sup>2</sup>, Gianluca Paredi <sup>3</sup>, Heinz Amenitsch <sup>4</sup>, Nina Franko <sup>5</sup>, Roberto Benoni <sup>1,†</sup>, Barbara Giabbai <sup>6</sup>, Maria Giovanna De Marino <sup>1,‡</sup>, Andrea Mozzarelli <sup>5,7</sup>, Luca Ronda <sup>1,7</sup>, Paola Storici <sup>6,\*</sup>, Barbara Campanini <sup>5,8,\*</sup> and Stefano Bettati <sup>1,7,8</sup>

<sup>1</sup> Dipartimento di Medicina e Chirurgia, Università di Parma, Via Gramsci 14, 43126, Parma, Italy; brenda.rosa@studenti.unipr.it (B.R.); roberto.benoni@uochb.cas.cz (R.B.); mariagiovanna.demarino@studenti.unipr.it (M.G.D.M.); luca.ronda@unipr.it (L.R.); stefano.bettati@unipr.it (S.B.)

<sup>2</sup> Centro Interdipartimentale Biopharmanet-TEC, Università di Parma, Parco Area delle Scienze 27/A, 43124, Parma, Italy; marialaura.marchetti@unipr.it (M.M.)

<sup>3</sup> Centro Interdipartimentale Siteia, Università di Parma, Parco Area delle Scienze 181/A, 43124, Parma, Italy; gianluca.paredi@unipr.it (G.P.)

<sup>4</sup> Graz University of Technology, Institute for Inorganic Chemistry, Stremayrgasse 9, 8010, Graz, Austria; heinz.amenitsch@elettra.eu (H.A.)

<sup>5</sup> Dipartimento di Scienze degli Alimenti e del Farmaco, Università di Parma, Parco Area delle Scienze 23/A, 43124, Parma, Italy; nina.franko@studenti.unipr.it (N.F.); andrea.mozzarelli@unipr.it (A.M.)

<sup>6</sup> Structural Biology Laboratory, Elettra Sincrotrone Trieste S.C.p.A., SS 14 km 163,5 in AREA Science Park – 34149, Basovizza -Trieste, Italy; barbara.giabbai@elettra.eu (B.G.)

<sup>7</sup> Istituto di Biofisica, CNR, Via Moruzzi 1, 56124, Pisa, Italy

<sup>8</sup> Italian National Institute of Biostructures and Biosystems, Via Medaglie d'Oro 305, 00136, Rome, Italy

\* Correspondence: paola.storici@elettra.eu; Tel: +39-0403-758854 (P.S.); barbara.campanini@unipr.it; Tel: +39-0521-906333 (B.C.)

† Current address: Institute of Organic Chemistry and Biochemistry CAS, Flemingovo nam. 2, Praha 6, 16610, Czech Republic

‡ Current address: Dipartimento di Medicina e Chirurgia, Università dell'Insubria, via Guicciardini 9, 21100 Varese, Italy

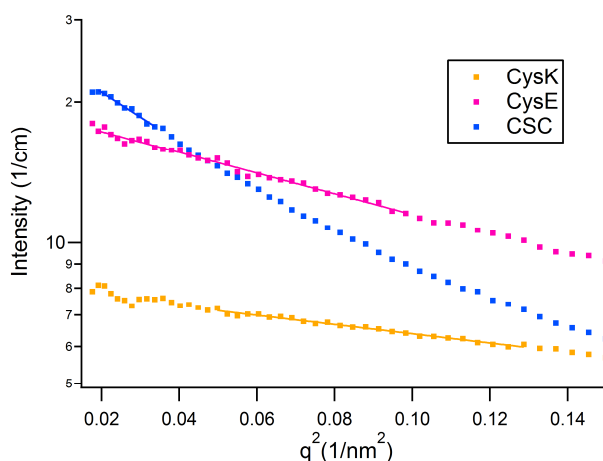

**Figure S1.** Guinier fits (continuous lines) determined in the  $q$  regime given in Table 1 with dots indicating data points of CysK (yellow), CysE (magenta) and CS complex (blue).

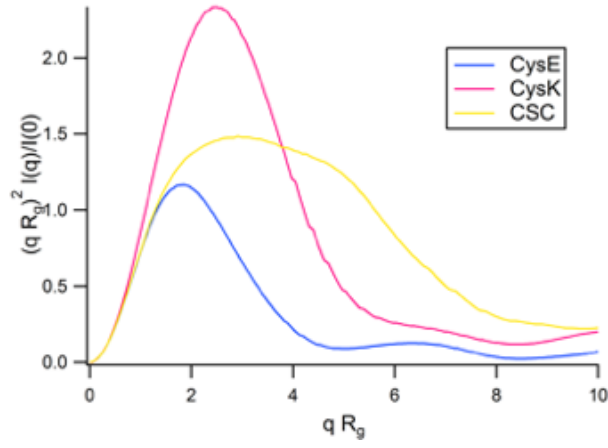

**Figure S2.** Dimensionless Kratky plots of the GNOM data shown in Figure 6A. CysK (cyan), CysE (blue) and CS complex (yellow).

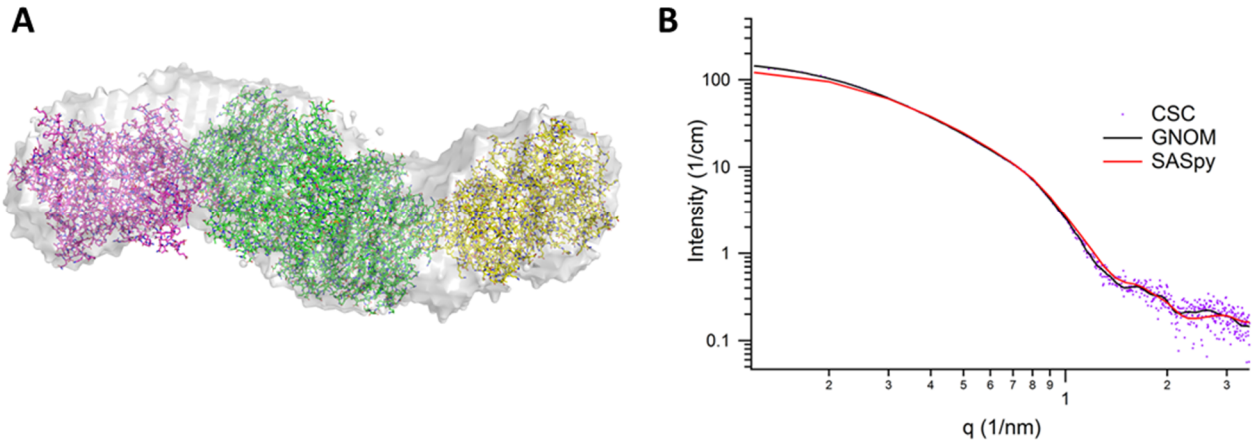

**Figure S3.** *Ab initio* model of CS complex overlaid with the manual SASpy model. (A) Real space model (B) SAXS data.
